# Supplementary material for: Thermo-responsive triple-function nanotransporter for efficient chemo-photothermal therapy of multidrug-resistant bacterial infection
Source: PubMed Central journal article supplement (PMC6760232; doi:10.1038/s41467-019-12313-3), 2019-09-24
Supplement: 41467_2019_12313_MOESM1_ESM.pdf [file 41467_2019_12313_MOESM1_ESM.pdf]

## **Supplementary Information**

# **Thermo-responsive triple-function nanotransporter for efficient chemo-photothermal therapy of multidrug-resistant bacterial infection**

Qing et al.

## **Supplementary Information**

### **Thermo-responsive triple-function nanotransporter for efficient chemophotothermal therapy of multidrug-resistant bacterial infection**

Guangchao Qing, Xianxian Zhao, Ningqiang Gong, Jing Chen, Xianlei Li, Yaling Gan, Yongchao Wang,

Zhen Zhang, Yuxuan Zhang, Weisheng Guo, Yang Luo, Xing-Jie Liang

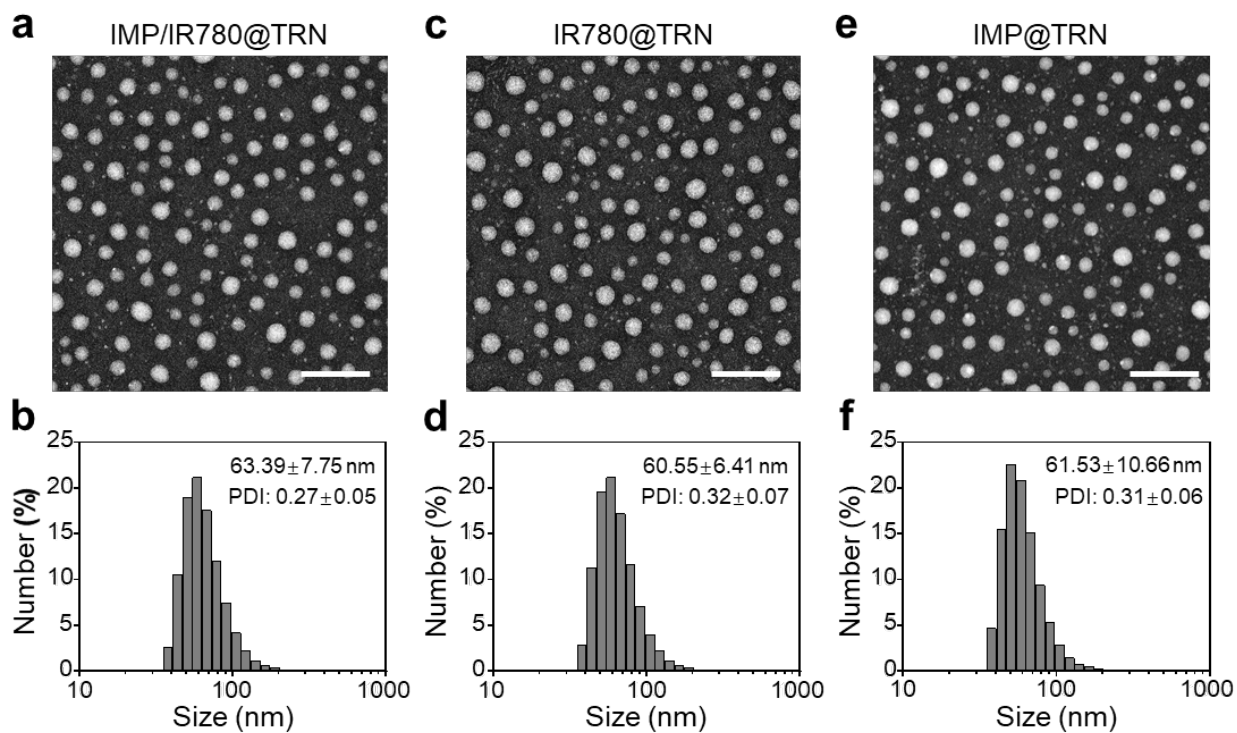

**Supplementary Figure 1. Morphology and size of IMP/IR780@TRN, IR780@TRN and IMP@TRN.**

**a, b** IMP/IR780@TRN. **c, d** IR780@TRN. **e, f** IMP@TRN. Data are presented as mean  $\pm$  s.d. (n=3).

Scale bars: 200 nm. Source data are provided as a Source Data file.

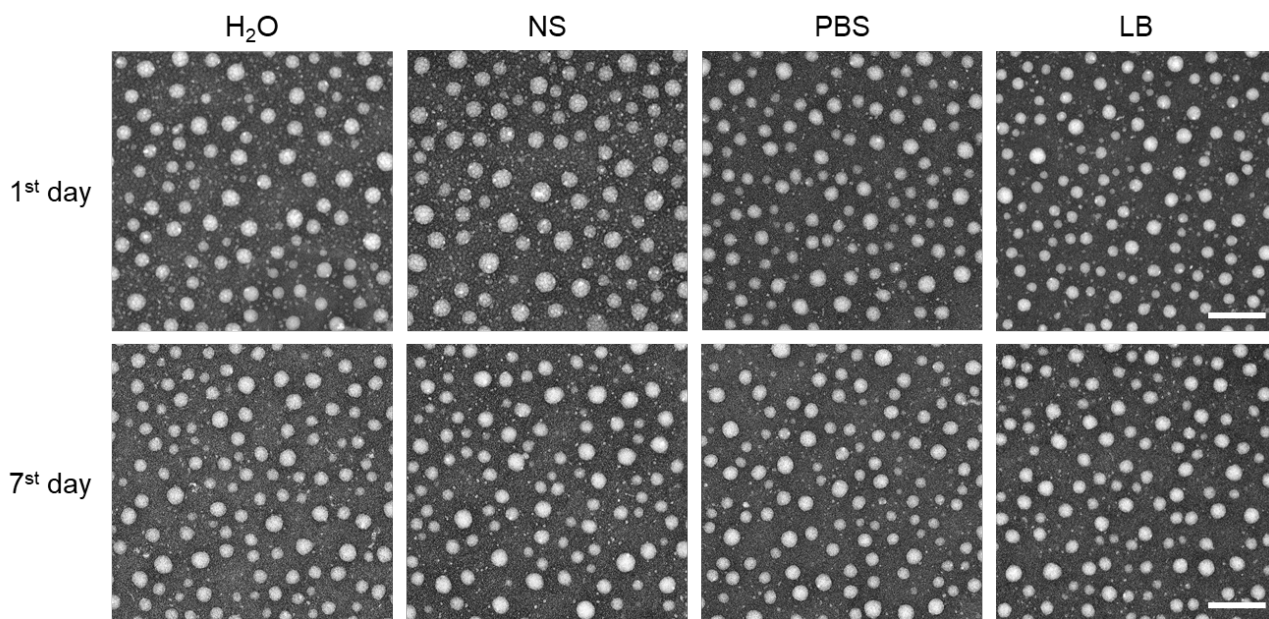

**Supplementary Figure 2. TEM images of the TRIDENTs dispersed in four solvents.** The size and morphology of the TRIDENTs showed no obvious change during the testing process. Scale bars: 200 nm.

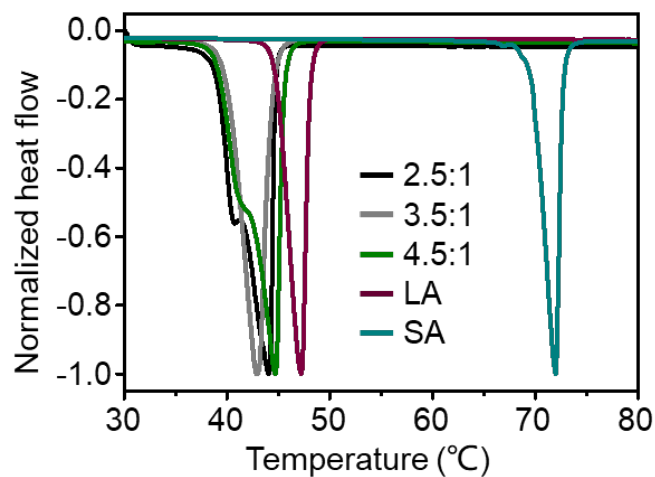

**Supplementary Figure 3. DSC curves of the TRNs prepared with different mass ratios of LA/SA.**

The phase change temperature of the TRN is lower than any of the components. Source data are provided as a Source Data file.

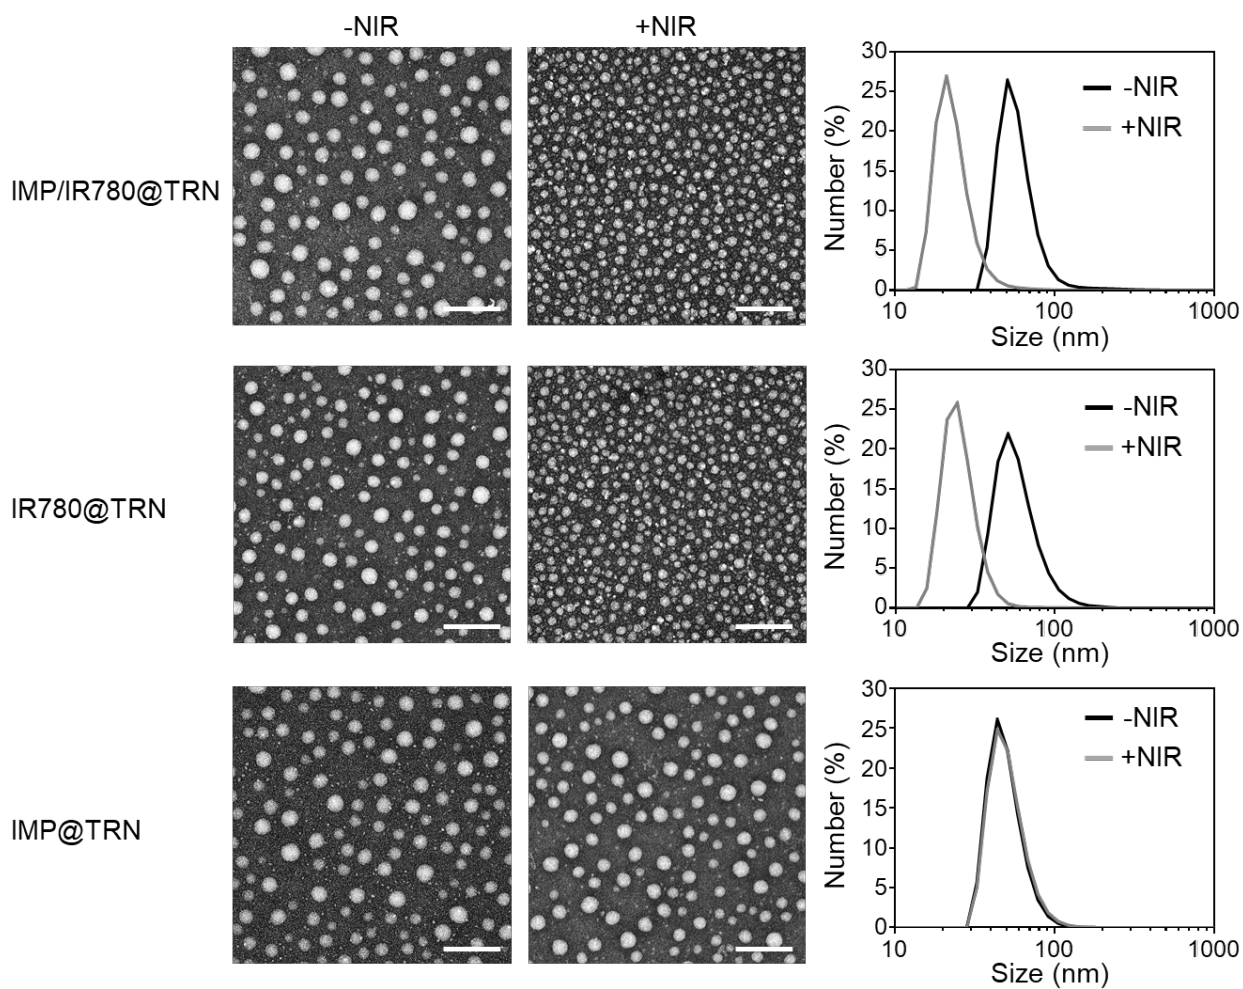

**Supplementary Figure 4. Morphological changes of the TRNs before and after NIR irradiation.** The size of the IMP/IR780@TRN and IR780@TRN became smaller after the irradiation while no obvious changes were obtained from the IMP@TRN. All TRNs remained spherical. Scale bars: 200 nm. Source data are provided as a Source Data file.

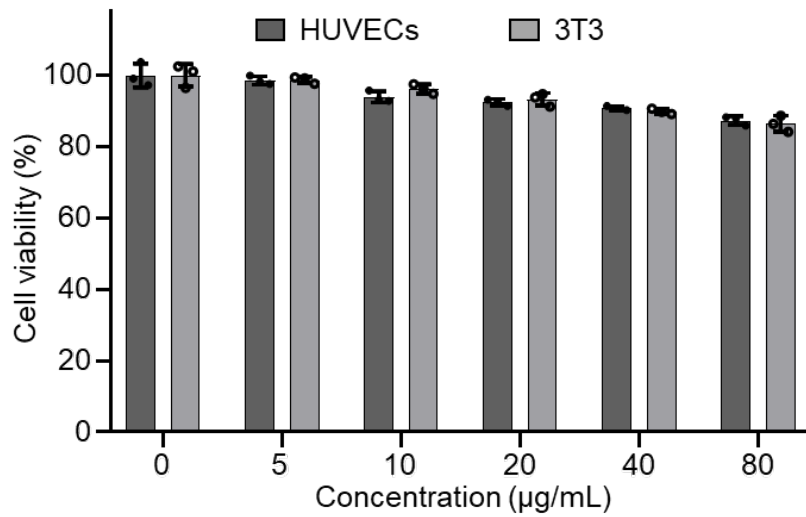

**Supplementary Figure 5. Cytotoxicity of the IMP/IR780@TRN to 3T3 cells and HUVECs *in vitro*.**

The concentration refers to the amount of loaded IMP (loading rate =  $51.62 \pm 3.68\%$ ) and IR780 (loading rate =  $74.85 \pm 6.60\%$ ). Data are presented as mean  $\pm$  s.d. (n=3). Source data are provided as a Source

Data file.

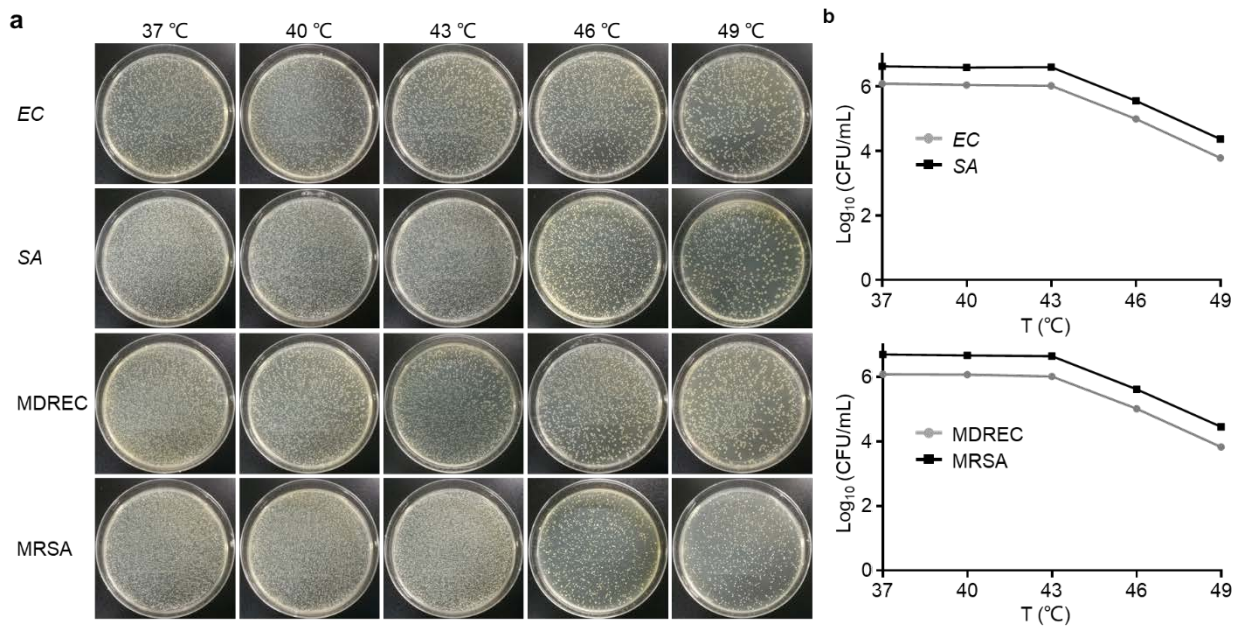

**Supplementary Figure 6. Thermal response of the bacteria to various temperatures. a** Images of the colonies formed on LB-agar plates. **b** Statistical analysis of the bacterial cell viability by  $\log_{10}(\text{CFU/mL})$ .

Source data are provided as a Source Data file.



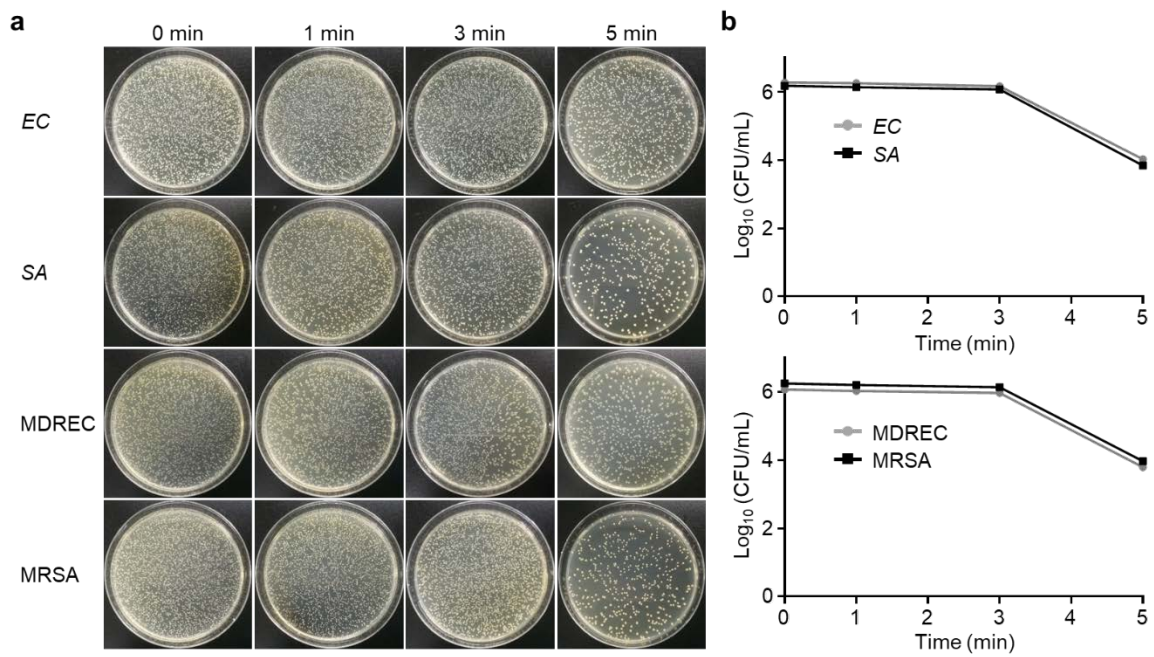

**Supplementary Figure 7. Thermal response of the bacteria treated at 49°C for different time. a** Images of the colonies formed on LB-agar plates. **b** Statistical analysis of the bacterial cell viability by  $\log_{10}$  (CFU/mL). Source data are provided as a Source Data file.

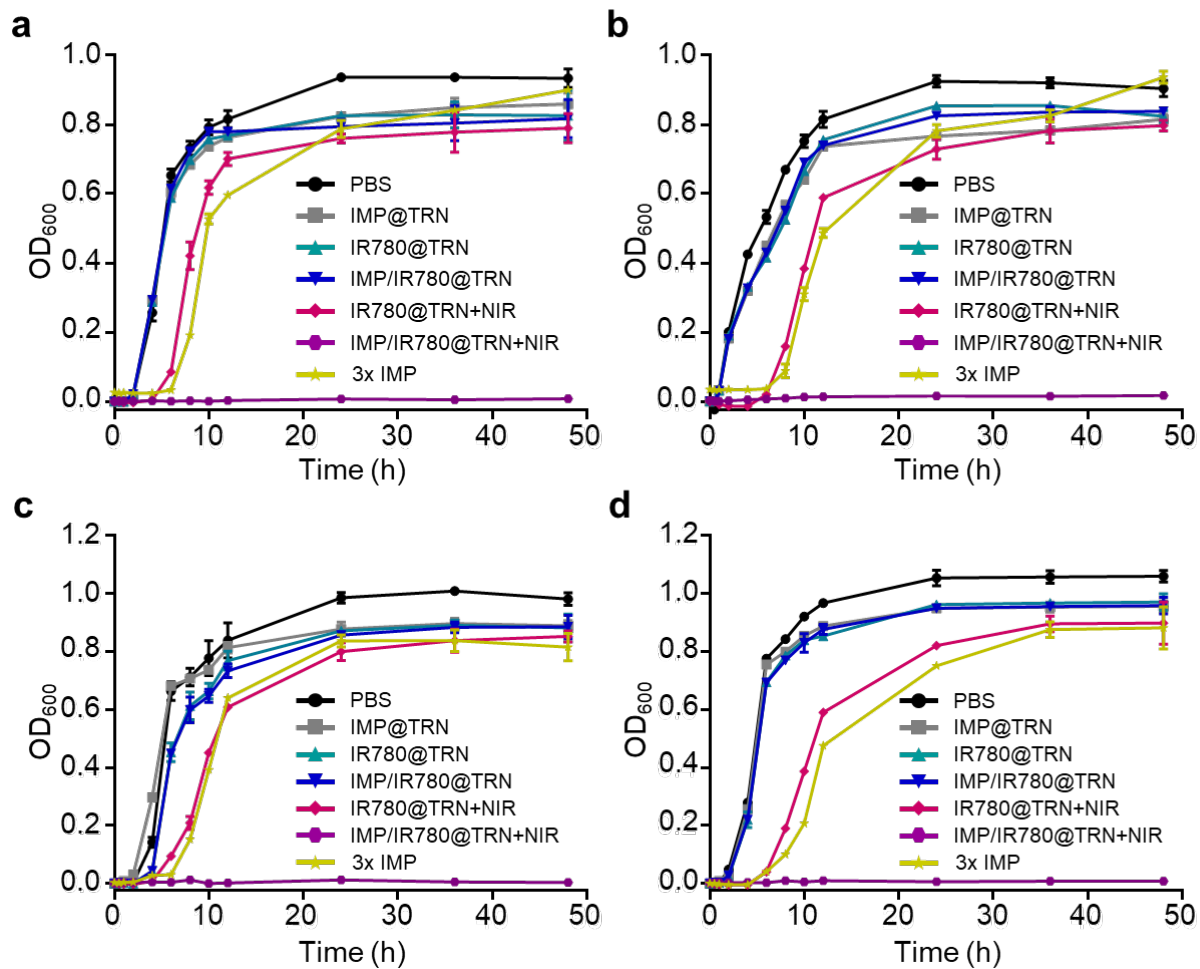

**Supplementary Figure 8. Growth-inhibition assay in liquid medium. a EC. b SA. c MDREC. d MRSA.**

After treatment with different formulations, the bacterial suspensions were cultured at 37°C and the optical density at 600 nm (OD<sub>600</sub>) was measured at the certain points. Data are presented as mean ± s.d.

(n=3). Source data are provided as a Source Data file.

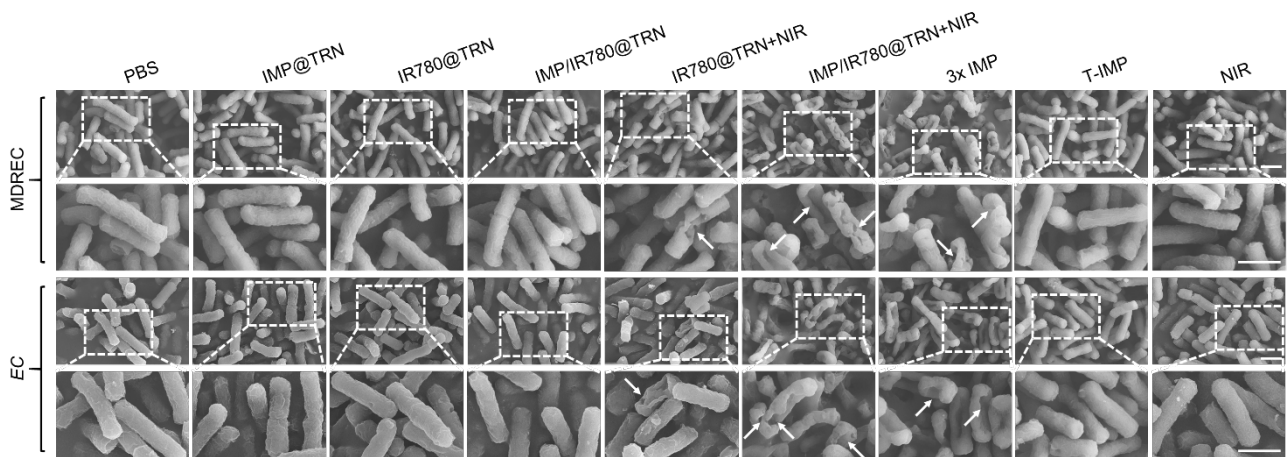

**Supplementary Figure 9. SEM images of MDREC and EC treated with various conditions. White arrows denote the morphological damages in bacterial cell. Scale bars: 1  $\mu$ m.**

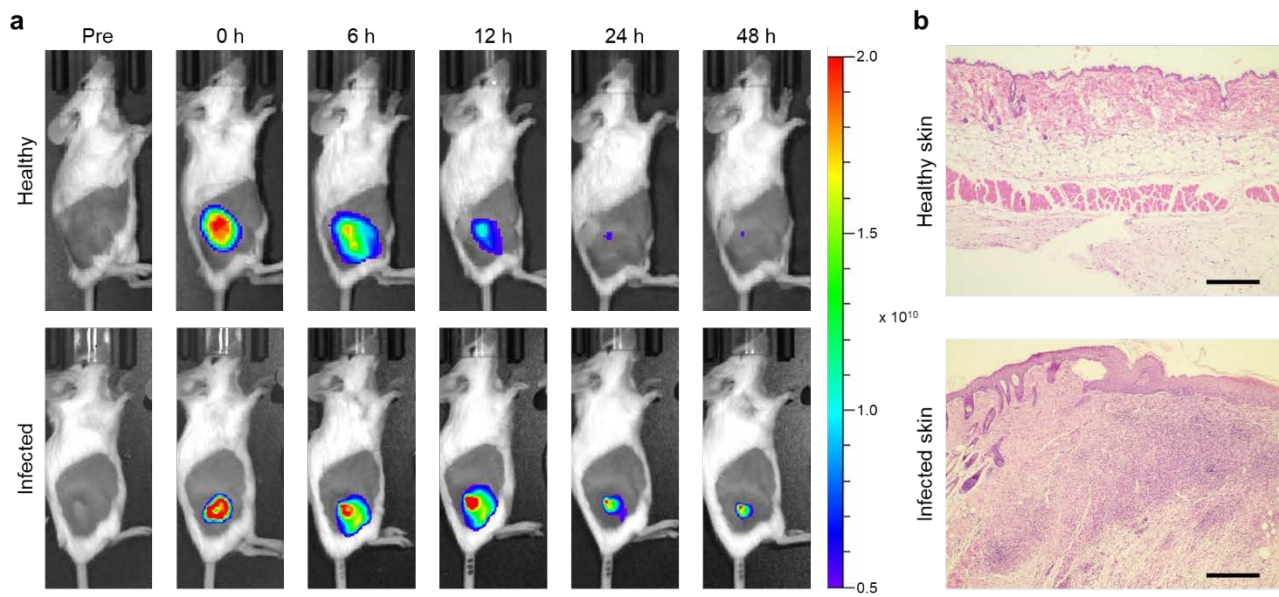

**Supplementary Figure 10. The retention of the TRIDENT after the local injection *in vivo*. a**

Fluorescence images of skin obtained from healthy and infected mice. The TRIDENT can stay in infected area for a long time while drift away rapidly from the injection site in normal skin tissue. **b** Corresponding histological photomicrographs of healthy and infected skin tissue sections. Scale bars: 20  $\mu\text{m}$ .

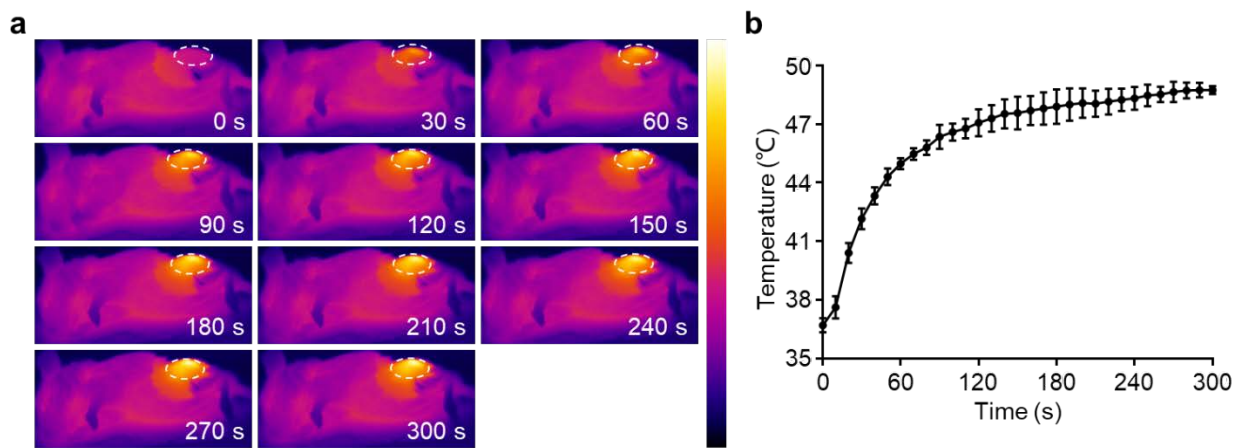

**Supplementary Figure 11. *In vivo* photothermal experiments for the developed TRIDENT. a** Thermal images of mice obtained from the test process. White dashed circles denote the infected skin. **b** Corresponding heating curve. Data are presented as mean  $\pm$  s.d. (n=4). Source data are provided as a Source Data file.

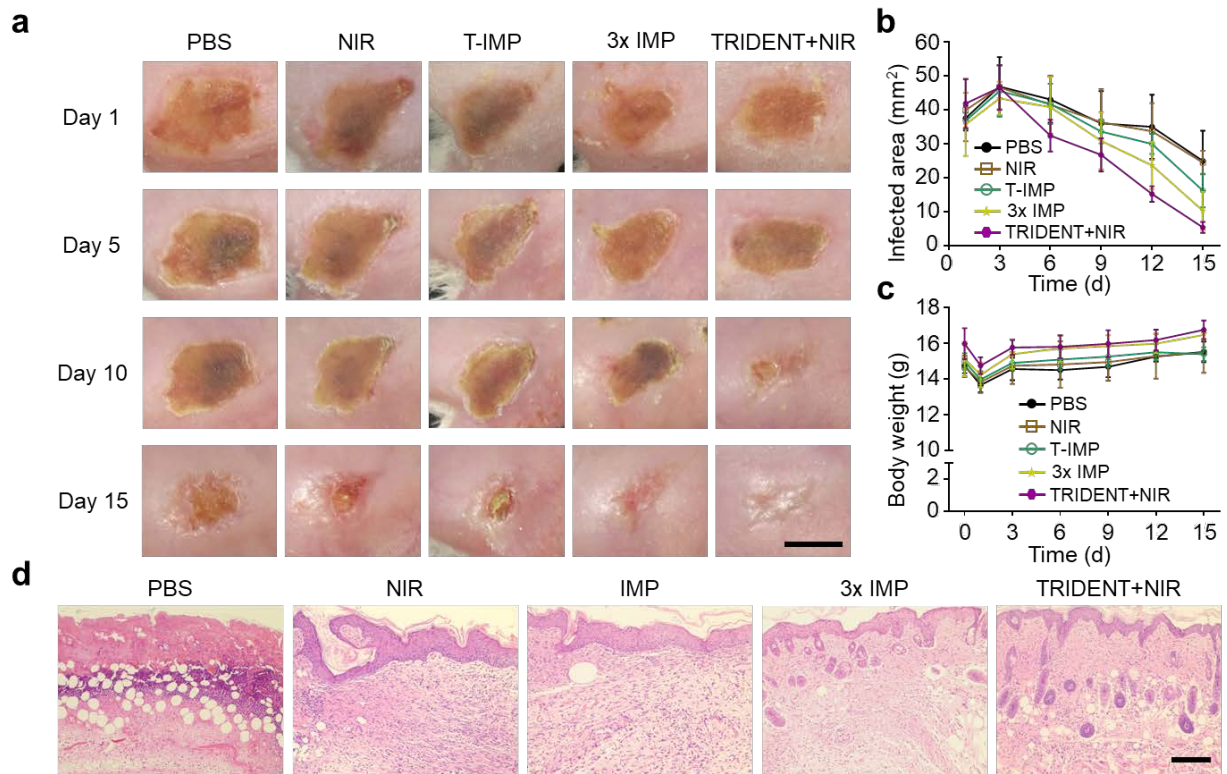

**Supplementary Figure 12. Antibacterial activities of different ways in the MRSA-infected mice. a**

Photographs of the infected skin of mice during treatment within 15 days. Scale bar: 5 mm. **b** Size of the infected area and **c** body weights of the mice. Data are presented as mean  $\pm$  s.d. (n=3). **d** Histological photomicrographs of skin tissue sections of infected mice after completion of the in vivo antibacterial activity experiment. Scale bar: 20  $\mu$ m. Source data are provided as a Source Data file.

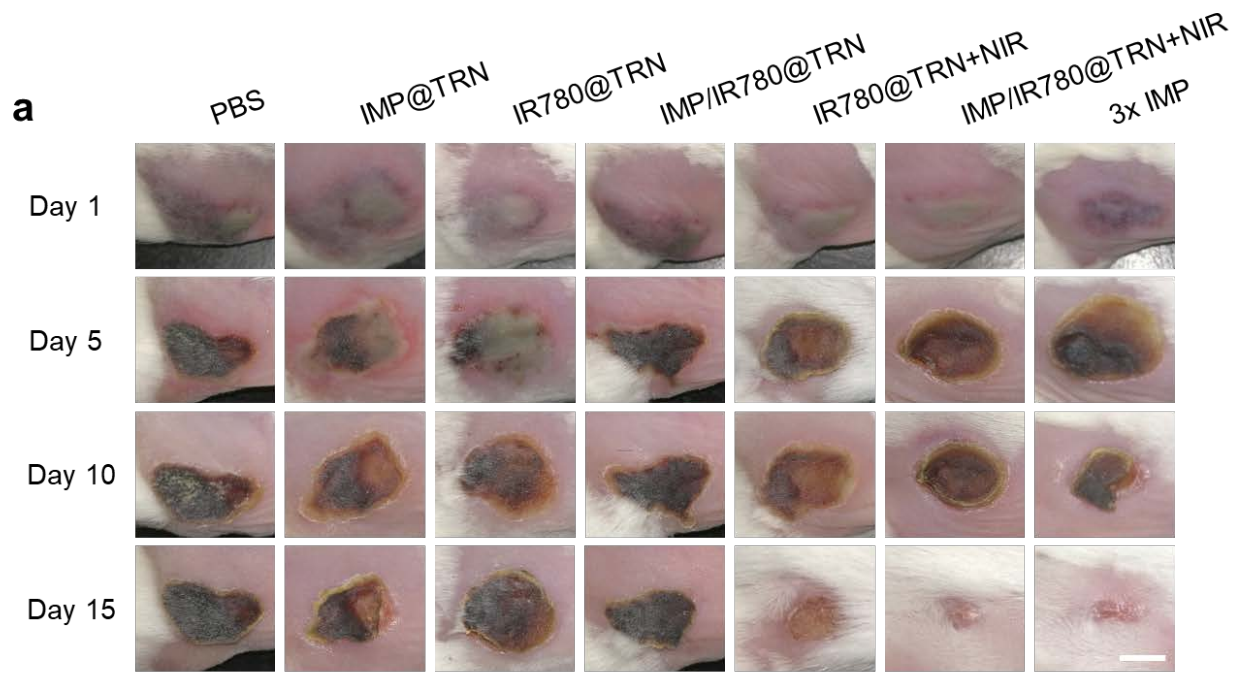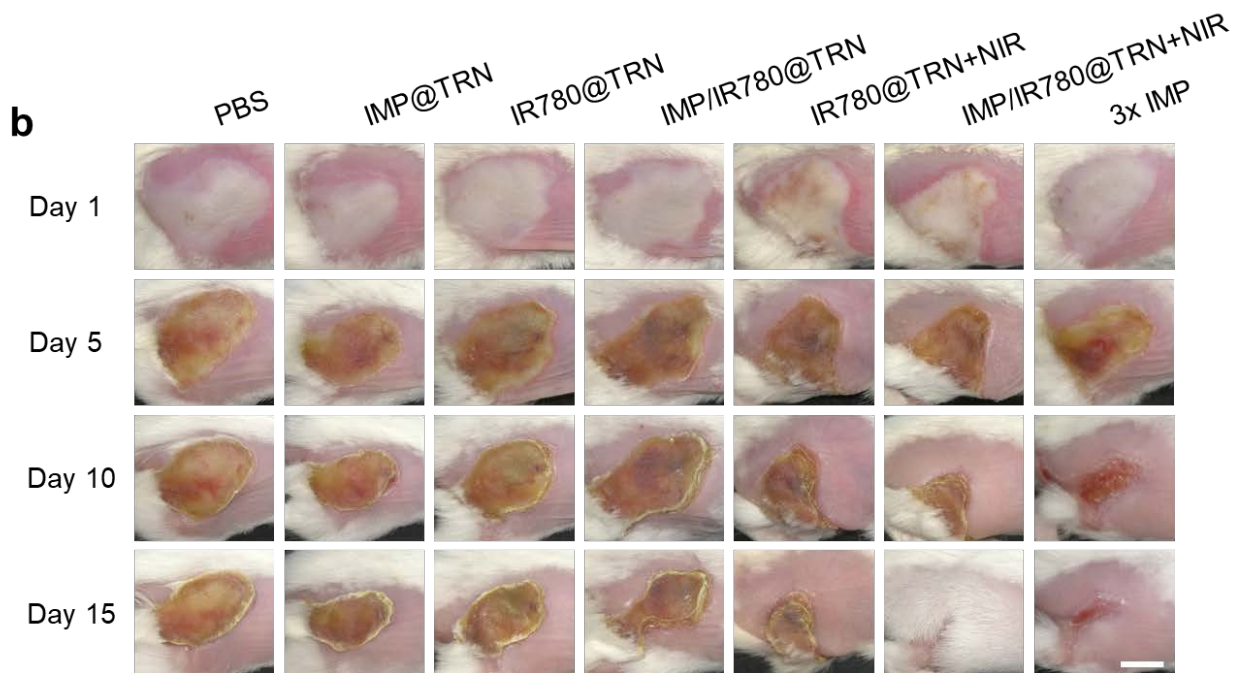

**Supplementary Figure 13. Changes in infected skin treated with different formulations. a** *EC*- and **b** *SA*-infected skin from mice during the treatment with different formulations for 15 days. Scale bars: 5 mm.

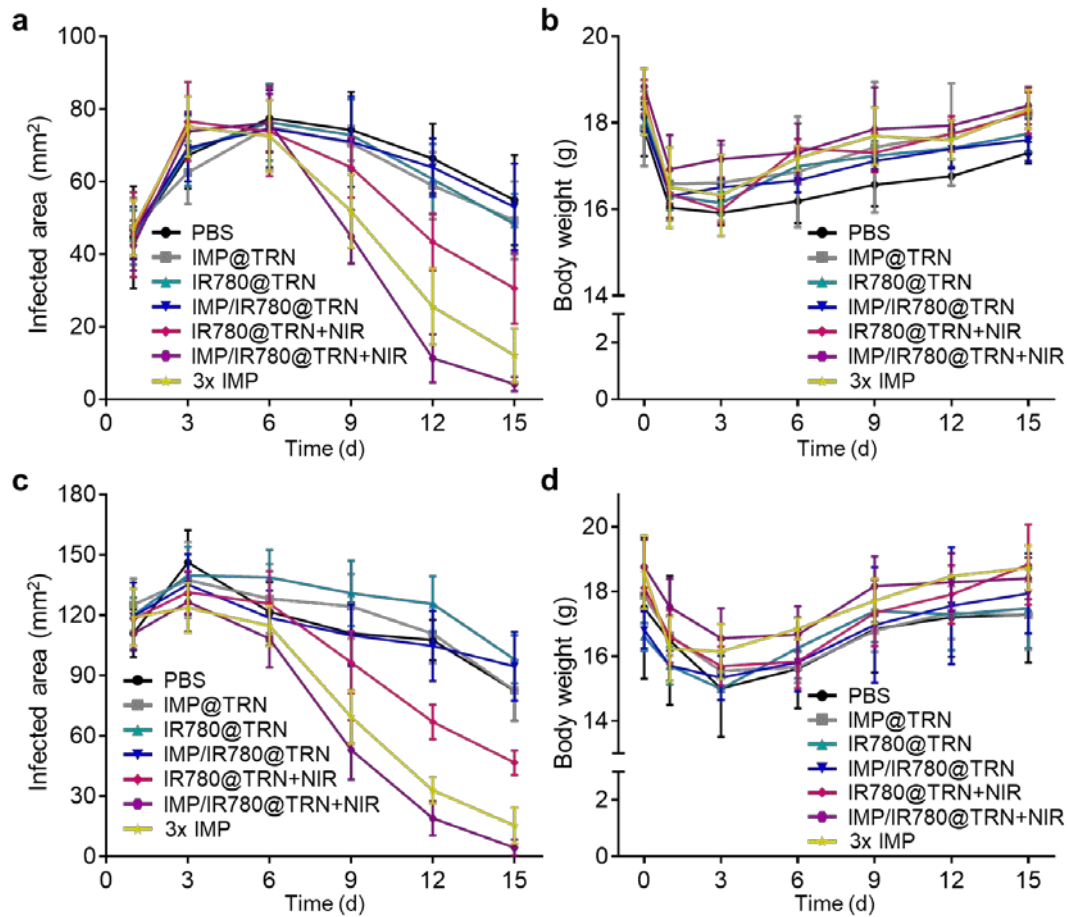

**Supplementary Figure 14. Change of the infected area and body weight within the testing process.**

**a** Curves of infected area and **b** body weight obtained from *EC*-infected mice during treatment with the different formulations for 15 days. **c** Curves of infected area and **d** body weight obtained from *SA*-infected mice during treatment with the different formulations for 15 days. Data are presented as mean  $\pm$  s.d. (n=3). Source data are provided as a Source Data file.



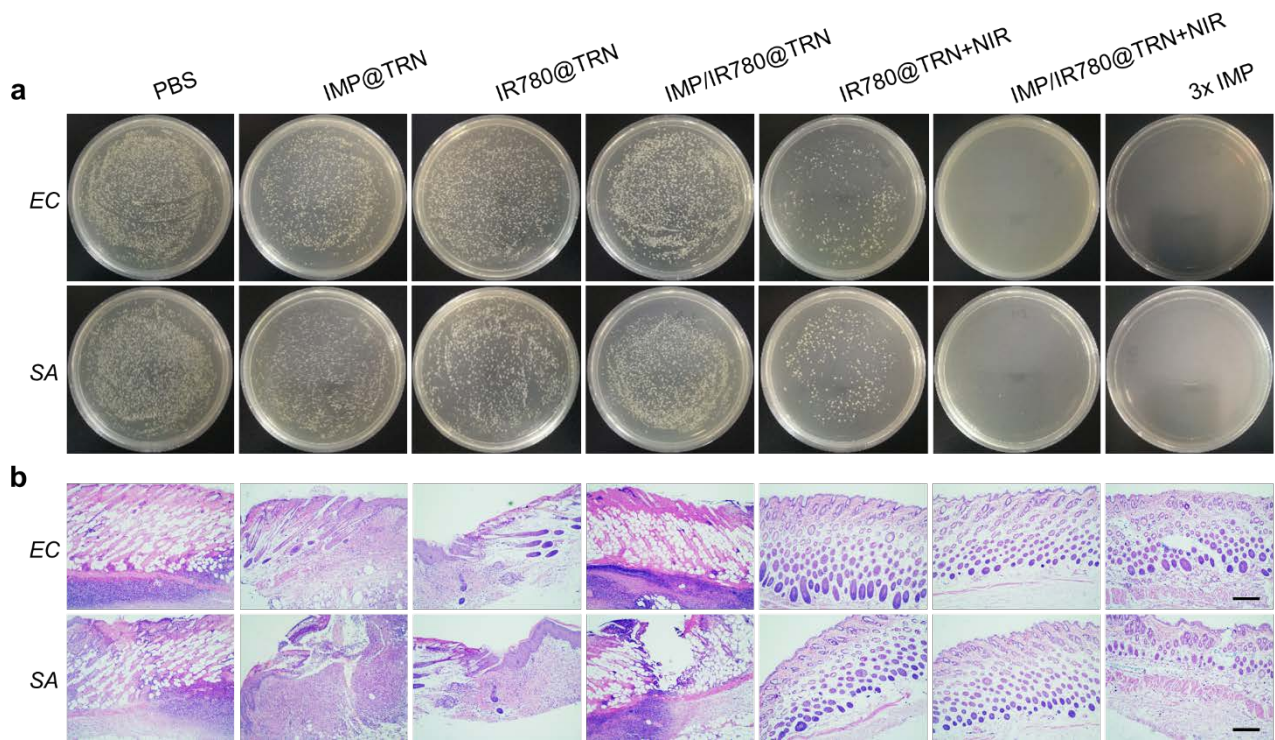

**Supplementary Figure 15. Evaluation the rehabilitation of skin tissues. a** Photographs of plated bacteria which were obtained from the infected tissues of mice in the different treatment groups. **b** Histological photomicrographs of skin tissue sections from infected mice in the different treatment groups. Scale bars: 20  $\mu\text{m}$ .

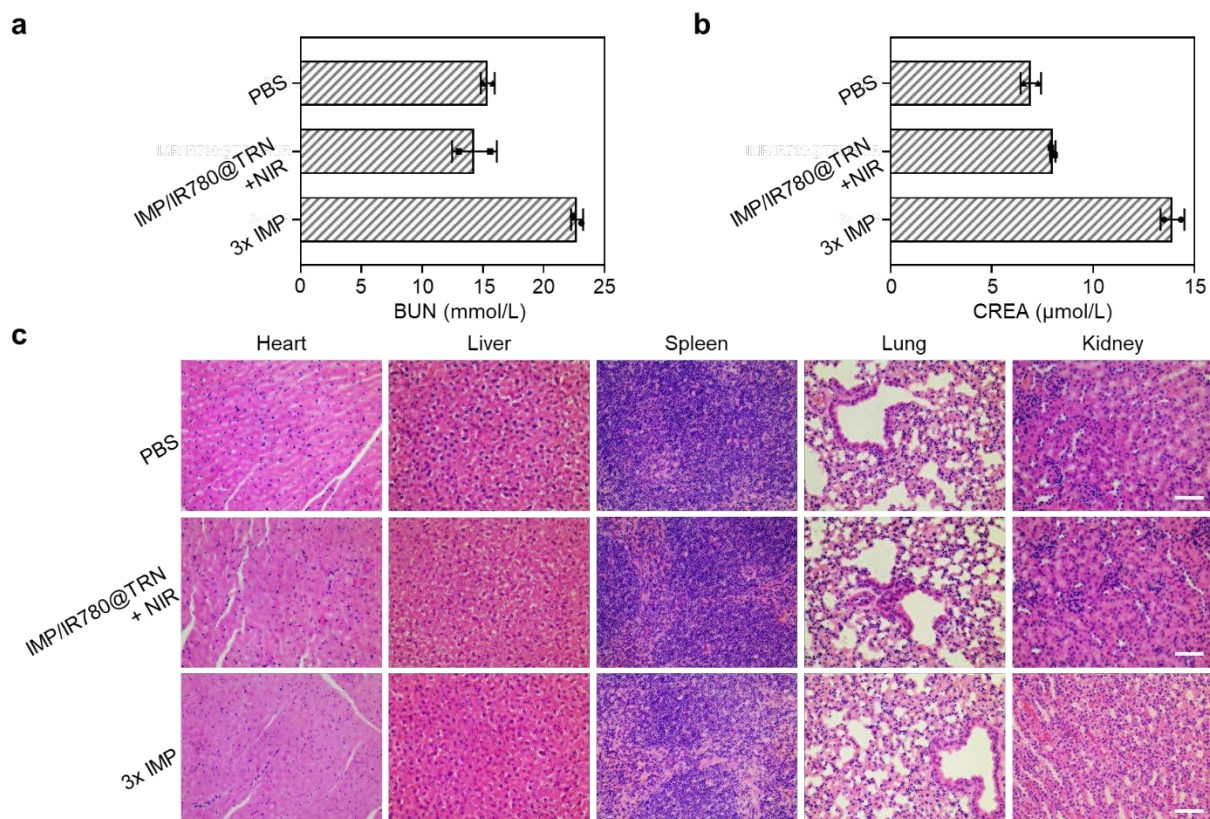

**Supplementary Figure 16. *In vivo* biosafety evaluations of TRIDENT.** **a** Biochemical analysis of blood urea nitrogen (BUN) and **b** creatinine (CREA) at completion of the treatment with PBS, TRIDENT+NIR or 3x IMP. PBS was administered as a control. Data are presented as mean  $\pm$  s.d. (n=2). **c** Histological study of different organs (heart, liver, spleen, lung, and kidney) from mice at the end of treatment with PBS, IMP/IR780@TRN+NIR and 3x IMP. Scale bars: 50  $\mu$ m. Source data are provided as a Source Data file.
